# Supplementary material
Source: PubMed Central journal article supplement (PMC6296174)
Supplement: PRO-28-68-s001.pdf [file PRO-28-68-s001.pdf]

**Supplementary Materials**  
for  
**Redox Control of Iodotyrosine Deiodinase**

Jimin Hu,<sup>1</sup> Qi Su,<sup>1</sup> Jamie L. Schlessman,<sup>2</sup> Steven E. Rokita<sup>1\*</sup>

<sup>1</sup>Department of Chemistry, Johns Hopkins University, 3400 N. Charles St., Baltimore, MD 21218 USA

<sup>2</sup>Chemistry Department, U.S. Naval Academy, Annapolis, MD 21402

**Table S1. Data collection and refinement statistics for T239A HslYD-F-Tyr.**

| Protein                                              | T239A HslYD-F-Tyr                                                   |
|------------------------------------------------------|---------------------------------------------------------------------|
| Protein Data Bank code                               | 5YAK                                                                |
| Ligands                                              | FMN and F-Tyr                                                       |
| <b>Data collection</b>                               |                                                                     |
| Space group                                          | $P6_1$                                                              |
| No. Molecule/ASU                                     | 6                                                                   |
| Unit cell parameters ( $\text{\AA}$ , $^\circ$ )     | $a=105.08, b=105.08, c=300.20$<br>$\alpha=90, \beta=90, \gamma=120$ |
| Resolution range ( $\text{\AA}$ ) <sup>a</sup>       | 46.5-2.30 (2.36-2.30)                                               |
| No. of observed reflections                          | 661766                                                              |
| No. of unique reflections <sup>a</sup>               | 82734 (5790)                                                        |
| Completeness <sup>a</sup>                            | 100 (99.8)                                                          |
| Redundancy <sup>a</sup>                              | 8.0 (8.2)                                                           |
| $R_{\text{sym}}$ (%) <sup>a</sup>                    | 9.3 (35.1)                                                          |
| $I/\sigma I$ <sup>a</sup>                            | 41.5 (6.5)                                                          |
| Wilson B factor ( $\text{\AA}^2$ )                   | 37.5                                                                |
| <b>Refinement</b>                                    |                                                                     |
| Resolution used in refinement ( $\text{\AA}$ )       | 46.52-2.30                                                          |
| No. of reflections used in working set               | 78650                                                               |
| No. of reflections for $R_{\text{free}}$ calculation | 4144                                                                |
| $R_{\text{work}}$ (%), $R_{\text{free}}$ (%)         | 18.3, 22.6                                                          |
| No. atoms                                            |                                                                     |
| Protein                                              | 11102 (A-F)                                                         |
| Heteroatoms                                          | 186/84 (FMN and F-Tyr)                                              |
| Solvent                                              | 386                                                                 |
| Mean $B$ -factor ( $\text{\AA}^2$ )                  |                                                                     |
| Protein                                              | 48.8                                                                |
| FMN                                                  | 38.3                                                                |
| F-Tyr                                                | 37.7                                                                |
| solvent                                              | 42.7                                                                |
| RMSD from ideality                                   |                                                                     |
| Bond lengths ( $\text{\AA}$ )                        | 0.012                                                               |
| Bond angles ( $^\circ$ )                             | 1.5                                                                 |
| Ramachandran analysis                                |                                                                     |
| Favored (%)                                          | 97.5                                                                |
| Allowed (%)                                          | 2.5                                                                 |
| Outliers                                             | 0                                                                   |

<sup>a</sup>The values in parentheses are for the highest resolution shell.

<sup>b</sup>The F-Tyr in PDB is YOF.

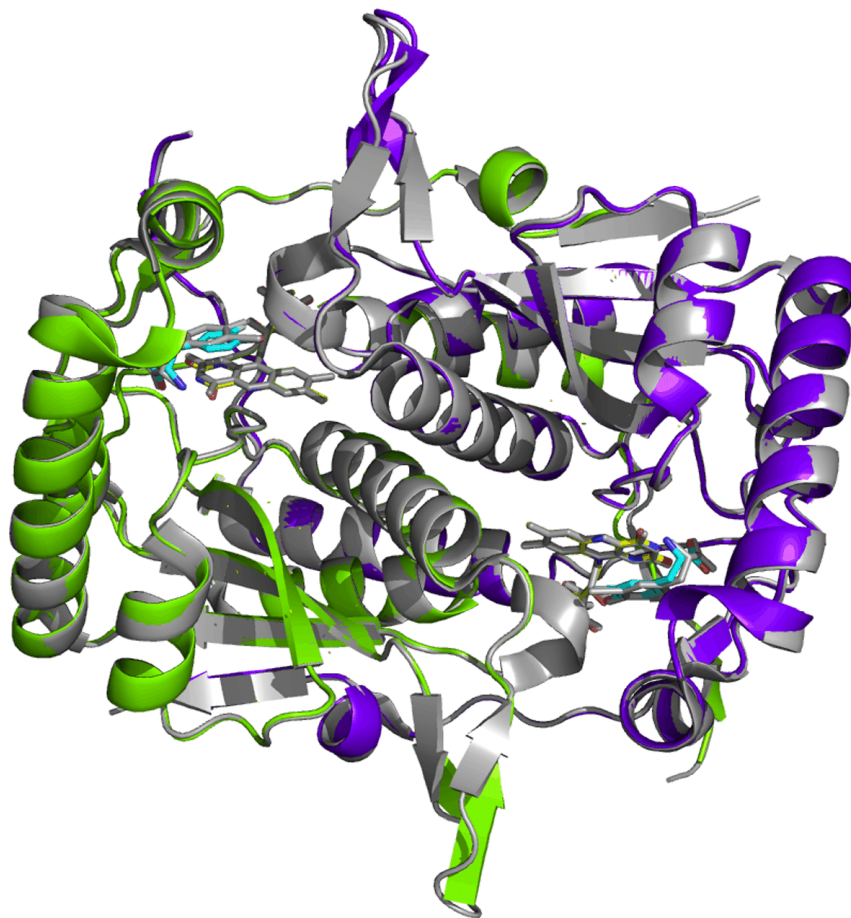

**Figure S1.** Structural comparisons between two forms of HsIYD with active site ligands. The co-crystal structure of HsIYD T239A (green and purple polypeptides of the  $\alpha_2$ -homodimer) and F-Tyr (carbons in cyan) (pdb 5YAK) is overlaid with the co-crystal structure of wild type HsIYD excluding the N-terminal transmembrane sequence, grey) and I-Tyr (grey) (pdb 4TTC).<sup>1</sup>

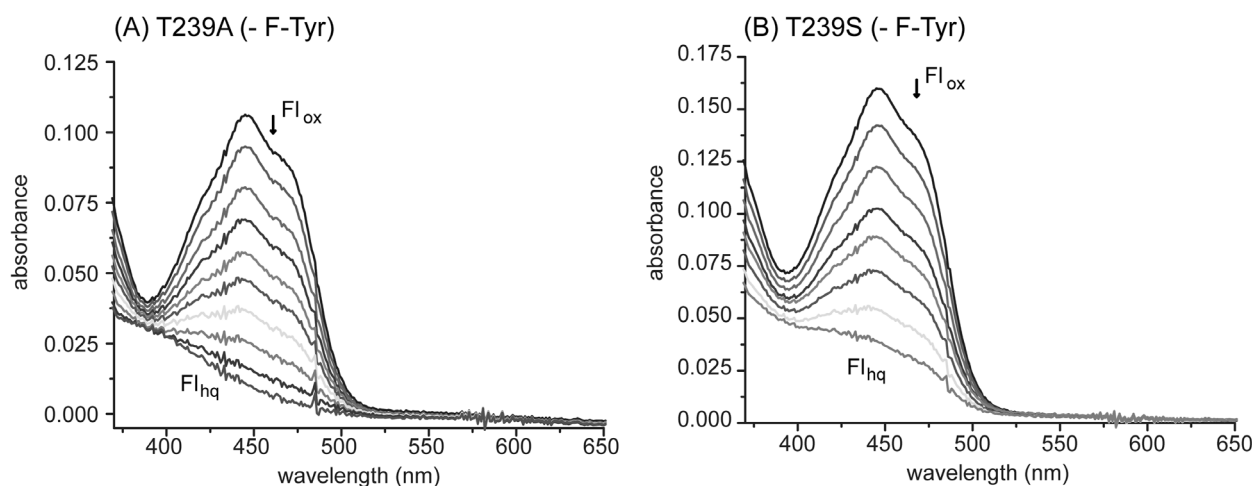

**Figure S2.** Reduction of (A) T239A and (B) T239S variants of HsIYD in the absence of F-Tyr. Solutions containing 900  $\mu\text{M}$  xanthine, 2  $\mu\text{M}$  methyl viologen, 200 mM potassium chloride and 100 mM potassium phosphate pH 7.4 were degassed with argon and reduction was initiated by addition of xanthine oxidase (40  $\mu\text{g}/\text{ml}$ ).<sup>2,3</sup>

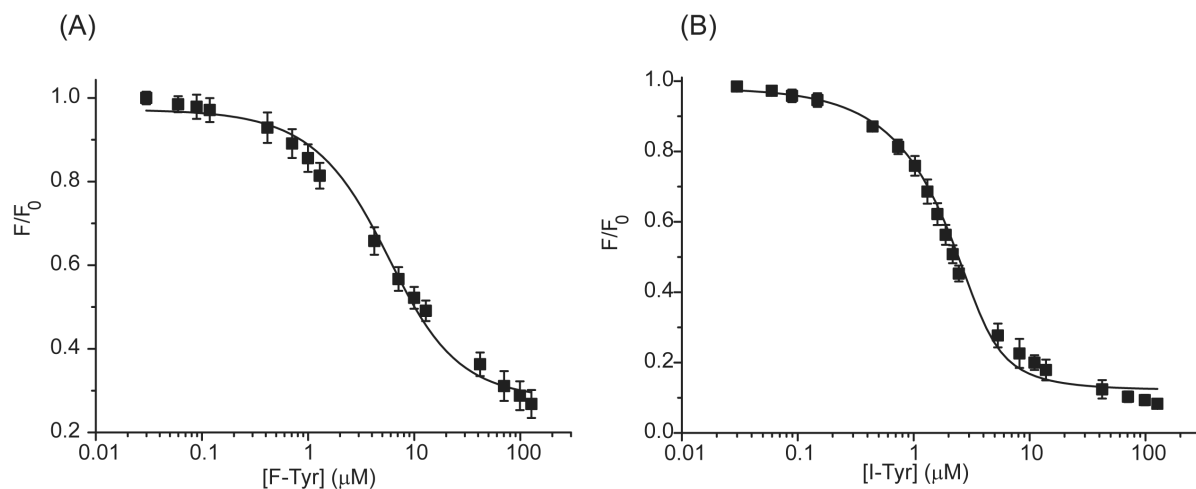

**Figure S3.** Affinity of the T239A variant of HsIYD for I-Tyr and F-Tyr. IYD (T239A, 4.5  $\mu\text{M}$ ) in 100 mM potassium phosphate pH 7.4 (25  $^{\circ}\text{C}$ ) was alternatively titrated with the indicated concentrations of (A) F-Tyr and (B) I-Tyr. Fluorescence ( $\lambda_{\text{ex}} = 450 \text{ nm}$ ,  $\lambda_{\text{em}} = 527 \text{ nm}$ ) of the active site  $\text{Fl}_{\text{ox}}$  was recorded and the ratio of emission observed (F) over the initial fluorescence ( $F_0$ ) was used to calculate  $K_d$  values as published previously.<sup>4,5</sup> Data points represent the average of three independent measurements and error bars indicate the standard deviation. The line indicates the non-linear best fit of the data.

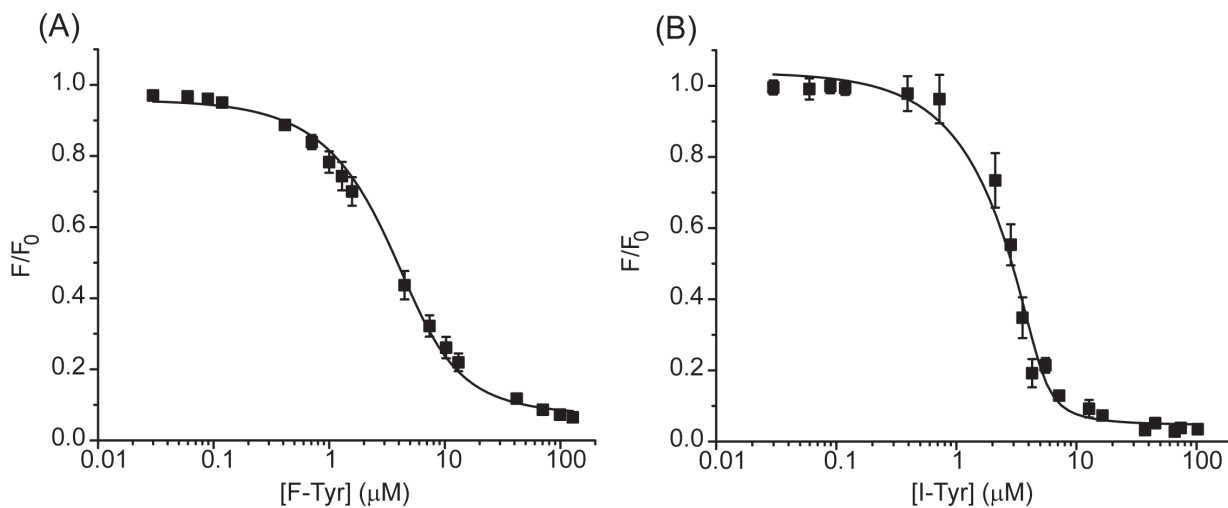

**Figure S4.** Affinity of the T239S variant of HsIYD for F-Tyr and I-Tyr. IYD (T239S, 4.5  $\mu\text{M}$ ) in 100 mM potassium phosphate pH 7.4 (25  $^{\circ}\text{C}$ ) was alternatively titrated with the indicated concentrations of (A) F-Tyr and (B) I-Tyr. Fluorescence ( $\lambda_{\text{ex}} = 450 \text{ nm}$ ,  $\lambda_{\text{em}} = 527 \text{ nm}$ ) of the active site  $\text{Fl}_{\text{ox}}$  was recorded and the ratio of emission observed (F) over the initial fluorescence ( $F_0$ ) was used to calculate  $K_d$  values as published previously.<sup>4,5</sup> Data points represent the average of three independent measurements and error bars indicate the standard deviation. The line indicates the non-linear best fit of the data.

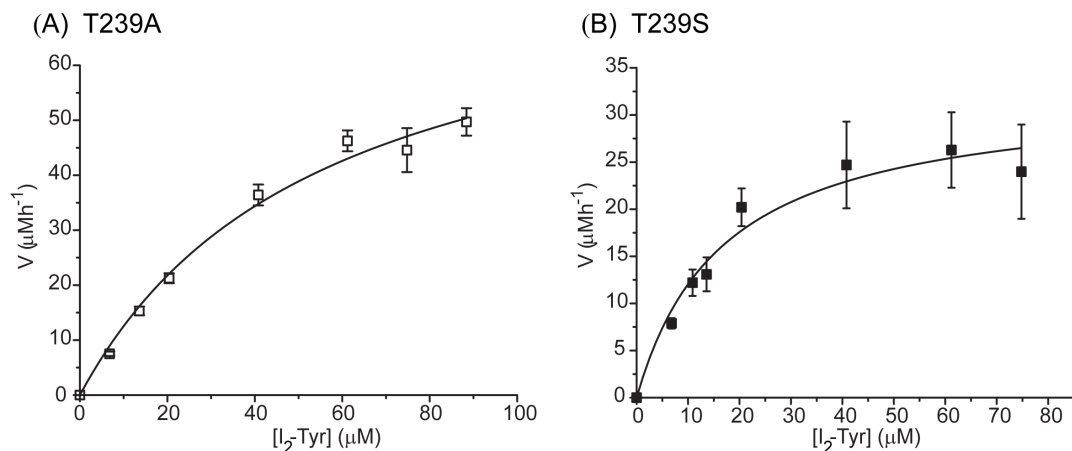

**Figure S5.** Catalytic deiodination of I<sub>2</sub>-Tyr by HsIYD T239A and T239S. Rates of deiodination were measured by release of [<sup>125</sup>I]-iodide from [<sup>125</sup>I]-I<sub>2</sub>-Tyr as described previously.<sup>6,7</sup> HsIYD variants (A) T239A (0.4 μM) and (B) T239S (0.08 μM) were incubated at 20 °C with the indicated concentrations of [<sup>125</sup>I]-I<sub>2</sub>-Tyr in 0.50 mM methimidazole, 50 mM 2-mercaptoethanol, 200 mM KCl, 100 mM potassium phosphate pH 7.4. Reaction was initiated by addition of 1% sodium dithionite (from a 10% stock in 5% sodium bicarbonate) and quenched after 10 min by addition of 100 μl of 0.1 % I<sub>2</sub>-Tyr in 0.1 M NaOH. [<sup>125</sup>I]-iodide was separated by ion exchange (AG50W-X8 resin) and quantified by scintillation counting. The average of the three independent measurements was fit to the Michaelis-Menten equation using Origin 7.0 (line) and the error represents the standard derivation of the three measurements.

**Figure S6.** Affinity of 2-nitrophenol for WT HsIYD. HsIYD (3 μM) in 100 mM MES pH 6.0, 500 mM NaCl and 10% glycerol was titrated with the indicated concentrations of 2-nitrophenol. Fluorescence ( $\lambda_{\text{ex}} = 450 \text{ nm}$ ,  $\lambda_{\text{em}} = 516 \text{ nm}$ ) of the active site Fl<sub>ox</sub> was recorded and the ratio of emission observed (F) over the initial fluorescence (F<sub>0</sub>) was used to calculate the  $K_d$  value for 2-nitrophenol as published previously.<sup>4,5</sup> The line indicates the non-linear best fit of three independent sets of data.

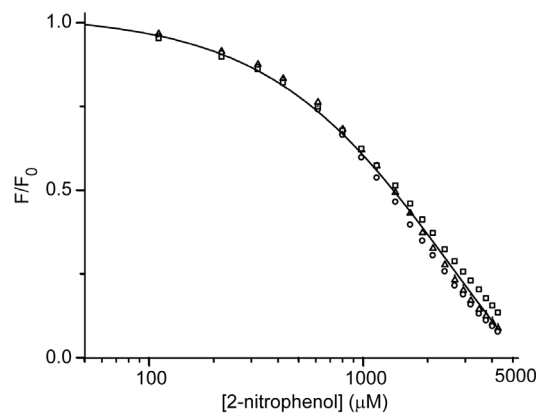

## References

1. Hu J, Chuenchor W, Rokita SE (2015) A switch between one- and two-electron chemistry of the human flavoprotein iodotyrosine deiodinase is controlled by substrate. *J. Biol. Chem.* 290:590-600.
2. Massey V. 1991. A simple method for the determination of redox potentials. In *Flavins Flavoproteins Proc. Int. Symp.* (eds. B. Curti, S. Ronchi, and G. Zanetti), pp. 59-66. Gruyter & Co., Berlin.
3. van den Heuvel RHH, Fraaije MW, Van Berkel WJH (2002) Redox properties of vanillyl-alcohol oxidase. *Methods Enzymol.* 353:177-186.
4. Warner JR, Copley SD (2007) Pre-steady-state kinetic studies of the reductive dehalogenation catalyzed by tetrachlorohydroquinone dehalogenase. *Biochemistry* 46:13211-13222.
5. McTamney PM, Rokita SE (2009) A mammalian reductive deiodinase has broad power to dehalogenate chlorinated and brominated substrates. *J. Am. Chem. Soc.* 131:14212-14213.
6. Rosenberg IN, Goswami A (1984) Iodotyrosine deiodinase from bovine thyroid. *Methods Enzymol.* 107:488-500.
7. Friedman JE, Watson JA, Jr., Lam DW-H, Rokita SE (2006) Iodotyrosine deiodinase is the first mammalian member of the NADH oxidase / flavin reductase superfamily. *J. Biol. Chem.* 281:2812-2819.
